# Supplementary material for: Gold-catalyzed cyclizations of alkyne propargylic acetates to 2,3-bis(alkylidene)cycloalkanones and their related benzene derivatives
Source: Royal Society of Chemistry journal article supplement (doi:10.1039/b705320g), 2007-01-01

## Supporting Information

### Gold-Catalyzed Cyclizations of Alkyne-Propargylic Acetates to 2,3-Bisalkylenecycloalkanones and Their Related Benzene Derivatives

Chang Ho Oh\* and Ahyun Kim

*Green Organic Synthesis Laboratory,  
Department of Chemistry, Hanyang University  
Sungdong-Gu, Seoul, 133-791, Korea  
E-mail: [changho@hanyang.ac.kr](mailto:changho@hanyang.ac.kr)*

Characterization of new compounds **2a-d**, **4a-f**, and **5h-i** are therein.

#### Table of Contents

1. General experimental procedure
2. Spectroscopic data of compounds **2a-d**, **4a-f**, and **5h-i**
3. <sup>1</sup>H and <sup>13</sup>C NMR Spectra of Compounds **2a-d**, **4a-f**, and **5h-i**

#### 1. General experimental procedure :

To a mixture of AuCl(PPh<sub>3</sub>) (80.0 mg, 0.16 mmol) and AgSbF<sub>6</sub> (54.0 mg, 0.16 mmol) in dry acetonitrile (0.5 mL) was added a solution of yne-propargylic acetate **1** (100.0 mg, 3.2 mmol) in dry dichloromethane (0.5 mL) at 0 °C under argon atmosphere. The resulting mixture was stirred for 5~10h at 25~80 °C. Upon completion of the reaction, the solvent was removed under vacuum and the crude product was subjected for flash column chromatography(SiO<sub>2</sub>, *n*-hexane/EtOAc = 10:1) to afford the pure products.

## 2. Spectroscopic data of compounds

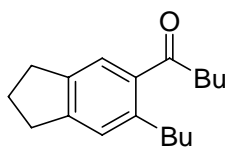

**Spectroscopic data of compound 2a:**  $^1\text{H}$  NMR (400 MHz,  $\text{CDCl}_3$ )  $\delta$  7.41 (s, 1H), 7.11 (s, 1H), 2.90 (t,  $J = 7.2$  Hz, 4H), 2.85 (t,  $J = 7.8$  Hz, 2H), 2.74 (t,  $J = 7.6$  Hz, 2H), 2.09 (quint,  $J = 7.2$  Hz, 2H), 1.68 (quint,  $J = 7.2$  Hz, 2H), 1.52 (m, 2H), 1.38 (m, 4H), 0.94 (t,  $J = 7.2$  Hz, 3H), 0.92 (t,  $J = 7.2$  Hz, 3H);  $^{13}\text{C}$  NMR (100 MHz,  $\text{CDCl}_3$ )  $\delta$  205.79, 147.74, 141.63, 140.93, 137.20, 127.06, 124.18, 42.11, 34.67, 33.82, 33.10, 32.61, 26.91, 25.62, 23.05, 22.71, 14.23, 14.18; FTIR (NaCl,  $\text{cm}^{-1}$ ) 1684, 1559, 1541, 1507; HRMS (ES) calcd for  $\text{C}_{18}\text{H}_{26}\text{O Na}^+$  ( $\text{M}+\text{Na}^+$ ) 281.1876, found 281.1883.

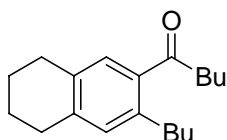

**Spectroscopic data of compound 2b:**  $^1\text{H}$  NMR (400 MHz,  $\text{CDCl}_3$ )  $\delta$  7.27 (s, 1H), 6.93 (s, 1H), 2.85 (t,  $J = 7.2$  Hz, 2H), 2.80-2.70 (m, 6H), 1.82-1.78 (m, 4H), 1.72-1.64 (m, 2H), 1.56-1.48 (m, 2H), 1.44-1.34 (m, 4H), 0.94 (t,  $J = 7.6$  Hz, 3H), 0.91 (t,  $J = 7.6$  Hz, 3H);  $^{13}\text{C}$  NMR (100 MHz,  $\text{CDCl}_3$ )  $\delta$  205.17, 140.70, 139.90, 136.16, 134.46, 131.89, 129.49, 41.78, 34.52, 29.55, 29.19, 26.90, 23.41, 23.23, 23.10, 22.71, 14.25, 14.21; FTIR (NaCl,  $\text{cm}^{-1}$ ) 1684, 1559, 1458; HRMS (ES) calcd for  $\text{C}_{19}\text{H}_{28}\text{O Na}^+$  ( $\text{M}+\text{Na}^+$ ) 295.2132, found 295.2033.

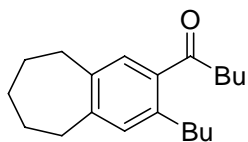

**Spectroscopic data of compound 2c:**  $^1\text{H}$  NMR (400 MHz,  $\text{CDCl}_3$ )  $\delta$  7.30 (s, 1H), 6.97 (s, 1H), 2.86 (t,  $J = 7.2$  Hz, 2H), 2.82-2.71 (m, 5H), 1.89-1.81 (m, 2H), 1.72-1.61 (m, 6H), 1.57-1.49 (m, 3H), 1.44-1.34 (m, 5H), 0.95 (t,  $J = 7.2$  Hz, 3H), 0.92 (t,  $J = 7.2$  Hz, 3H);  $^{13}\text{C}$  NMR (100 MHz,  $\text{CDCl}_3$ )  $\delta$  205.23, 146.89, 140.71, 140.64, 136.28, 132.11, 129.27, 41.82, 36.83, 36.55, 34.46, 33.50, 32.85, 29.93, 28.52, 28.33, 26.85, 23.12, 22.71, 14.24, 14.20; FTIR (NaCl,  $\text{cm}^{-1}$ ) 1683, 1609, 1557; HRMS (ES) calcd for  $\text{C}_{20}\text{H}_{30}\text{ONa}^+$  ( $\text{M}+\text{Na}^+$ ) 309.2189; found 309.2194.

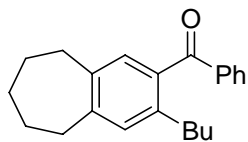

**Spectroscopic data of compound 2d:**  $^1\text{H}$  NMR (400 MHz,  $\text{CDCl}_3$ )  $\delta$  7.82-7.79 (m, 2H), 7.56 (m, 1H), 7.46-7.42 (m, 2H), 7.03 (s, 1H), 7.01 (s, 1H), 2.81 (dd,  $J = 7.0, 2.0$  Hz, 2H), 2.74 (dd,  $J = 7.2, 2.0$  Hz, 2H), 2.59 (t,  $J = 8.0$  Hz, 2H), 1.84 (m, 2H), 1.70-1.60 (m, 4H), 1.53-1.45 (m, 2H), 1.29-1.22 (m, 2H), 0.82 (t,  $J = 7.2$  Hz, 3H);  $^{13}\text{C}$  NMR (100 MHz,  $\text{CDCl}_3$ )  $\delta$  199.01, 145.89, 140.12, 139.72, 138.38, 135.86, 132.78, 130.93, 130.11, 129.40, 128.27, 36.67, 36.10, 34.02, 32.61, 28.24, 28.15, 22.61, 13.82; FTIR (NaCl,  $\text{cm}^{-1}$ ) 1663, 1596; HRMS (ES) calcd for  $\text{C}_{22}\text{H}_{26}\text{O Na}^+$  ( $\text{M}+\text{Na}^+$ ) 329.1876, found 329.1886.

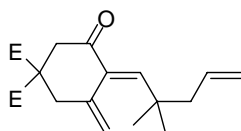

**Spectroscopic data of compound 4a:**  $^1\text{H}$  NMR (400 MHz,  $\text{CDCl}_3$ )  $\delta$  5.99 (s, 1H), 5.81-5.70 (m, 1H), 5.03-4.98 (m, 3H), 4.81 (q,  $J = 1.2$  Hz,

1H), 4.25-4.13 (m, 4H), 2.98 (s, 2H), 2.87 (s, 2H), 2.28 (d,  $J = 7.2$  Hz, 2H), 1.14(s, 6H), 1.23(t,  $J=6.8$ , 6H);  $^{13}\text{C}$  NMR (100 MHz,  $\text{CDCl}_3$ )  $\delta$  197.78, 170.06, 149.44, 144.193, 138.61, 135.65, 117.48, 112.86, 62.19, 55.20, 47.52, 46.98, 38.91, 36.85, 27.73, 14.23; FTIR (NaCl,  $\text{cm}^{-1}$ ) 1745, 1670; HRMS (ES) calcd for  $\text{C}_{20}\text{H}_{28}\text{O}_5\text{Na}^+$  ( $\text{M}+\text{Na}^+$ ) 371.1834, found 371.1830.

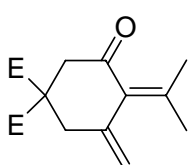

**Spectroscopic data of compound 4b:**  $^1\text{H}$  NMR (400 MHz,  $\text{CDCl}_3$ )  $\delta$  5.21 (s, 1H), 4.82 (s, 1H), 4.18 (q,  $J = 7.2$  Hz, 4H), 3.00 (s, 1H), 2.83 (s, 1H), 2.07 (s, 2H), 1.97 (s, 2H), 1.23 (t,  $J = 7.2$  Hz, 6H);  $^{13}\text{C}$  NMR (100 MHz,  $\text{CDCl}_3$ )  $\delta$  197.06, 170.30, 146.64, 139.74, 135.01, 117.80, 62.11, 55.10, 46.53, 39.94, 24.34, 22.90, 14.25; FTIR (NaCl,  $\text{cm}^{-1}$ ) 1750, 1686; HRMS (ES) calcd for  $\text{C}_{16}\text{H}_{22}\text{O}_5\text{Na}^+$  ( $\text{M}+\text{Na}^+$ ) 317.1365, found 317.1361.

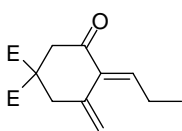

**Spectroscopic data of compound 4c:**  $^1\text{H}$  NMR (400 MHz,  $\text{CDCl}_3$ )  $\delta$  6.73 (t,  $J = 7.6$  Hz, 1H), 5.23 (d,  $J = 1.2$  Hz, 1H), 4.95 (s, 1H), 4.19 (q,  $J = 7.2$  Hz, 4H), 2.96 (s, 2H), 2.85 (s, 1H), 2.35 (m, 2H), 1.23 (t,  $J = 7.2$  Hz, 6H), 1.08 (t,  $J = 7.8$  Hz, 3H);  $^{13}\text{C}$  NMR (100 MHz,  $\text{CDCl}_3$ )  $\delta$  195.67, 169.92, 144.16, 137.16, 136.13, 117.39, 61.91, 54.47, 44.36, 39.70, 22.89, 14.00, 13.73; FTIR (NaCl,  $\text{cm}^{-1}$ ) 1740, 1692; HRMS (ES) calcd for  $\text{C}_{16}\text{H}_{22}\text{O}_5\text{Na}^+$  ( $\text{M}+\text{Na}^+$ ) 317.1365, found 317.1369.

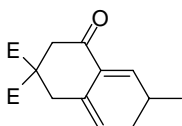

**Spectroscopic data of compound 4d :**  $^1\text{H}$  NMR (400 MHz,  $\text{CDCl}_3$ )  $\delta$  6.50 (t,  $J = 7.6$  Hz, 1H), 5.18 (d,  $J = 1.2$  Hz, 1H), 4.97 (s, 1H), 4.19 (q,  $J = 7.2$  Hz, 4H), 2.97 (s, 2H), 2.86 (m, 1H), 2.85 (s, 2H), 1.23(t,  $J = 7.2$  Hz, 6H), 1.04( d,  $J = 6.8$  Hz, 6H);  $^{13}\text{C}$  NMR (100 MHz,  $\text{CDCl}_3$ )  $\delta$  196.32, 170.16, 148.63, 137.64, 135.13, 116.98, 62.16, 54.72, 44.68, 40.02, 27.93, 22.73, 14.25 FTIR (NaCl,  $\text{cm}^{-1}$ ) 1755, 1685; HRMS (ES) calcd for  $\text{C}_{17}\text{H}_{24}\text{O}_5\text{Na}^+$  ( $\text{M}+\text{Na}^+$ ) 331.1521, found 331.1527.

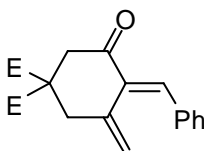

**Spectroscopic data of compound 4e :**  $^1\text{H}$  NMR (400 MHz,  $\text{CDCl}_3$ )  $\delta$  7.56-7.54(m, 2H), 7.45 (s, 1H), 7.32-7.27 (m, 3H), 5.14(s, 1H), 5.08 (d,  $J = 1.2$  Hz, 1H), 4.20 (q,  $J=7.6$ , 4H), 3.12 (s, 1H), 2.95 (s, 1H), 1.23 (t,  $J = 7.2$  Hz, 6H);  $^{13}\text{C}$  NMR (100 MHz,  $\text{CDCl}_3$ )  $\delta$  195.46, 169.87, 136.81, 136.36, 134.82, 129.59, 128.85, 128.42, 119.00, 62.02, 54.38, 44.71, 39.34, 13.99; FTIR (NaCl,  $\text{cm}^{-1}$ ) 1745, 1680, 1591; HRMS (ES) calcd for  $\text{C}_{20}\text{H}_{22}\text{O}_5\text{Na}^+$  ( $\text{M}+\text{Na}^+$ ) 365.1365, found 365.1361.

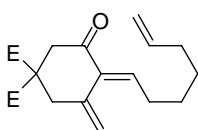

**Spectroscopic data of compound 4f :**  $^1\text{H}$  NMR (400 MHz,  $\text{CDCl}_3$ )  $\delta$  6.74 (t,  $J=7.6$ , 1H), 5.83-5.73(m, 1H), 5.23 (d,  $J = 1.2$  Hz, 1H), 5.02-4.92(m, 3H), 4.19 (q,  $J = 7.2$  Hz, 4H), 4.18 (q,  $J = 7.2$  Hz, 4H), 2.96 (s, 1H), 2.85 (s, 1H),

2.34 (q,  $J = 7.2$  Hz, 2H), 2.07-2.01 (m, 2H), 1.52-1.37 (m, 4H), 1.23 (t,  $J = 7.6$  Hz, 6H);  $^{13}\text{C}$  NMR (100 MHz,  $\text{CDCl}_3$ )  $\delta$  195.60, 169.90, 142.64, 138.49, 137.17, 117.46, 114.63, 61.91, 54.46, 44.35, 39.70, 33.43, 29.67, 29.28, 28.61, 28.54, 13.99; FTIR (NaCl,  $\text{cm}^{-1}$ ) 1748, 1679; HRMS (ES) calcd for  $\text{C}_{20}\text{H}_{28}\text{O}_5\text{Na}^+$  ( $\text{M}+\text{Na}^+$ ) 371.1834, found 371.1840.

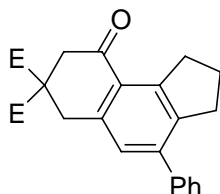

**Spectroscopic data of compound 5h:**  $^1\text{H}$  NMR (400 MHz,  $\text{CDCl}_3$ )  $\delta$  7.46-7.41 (m, 3H), 7.39-7.35 (m, 2H), 7.11 (s, 1H), 4.17 (q,  $J = 6.8$  Hz, 4H), 3.53 (s, 2H), 3.38 (t,  $J = 7.6$  Hz, 2H), 3.10 (s, 1H), 2.88 (t,  $J = 7.2$  Hz, 2H), 2.04 (m, 2H), 1.19 (t,  $J = 7.2$  Hz, 6H);  $^{13}\text{C}$  NMR (100 MHz,  $\text{CDCl}_3$ )  $\delta$  195.52, 170.68, 148.50, 143.87, 143.49, 140.92, 138.75, 129.05, 128.39, 128.27, 127.22, 62.63, 55.97, 45.27, 36.13, 35.19, 32.64, 26.20, 14.62; FTIR (NaCl,  $\text{cm}^{-1}$ ) 1750, 1729, 1682, 1593; HRMS (ES) calcd for  $\text{C}_{25}\text{H}_{26}\text{O}_5\text{Na}^+$  ( $\text{M}+\text{Na}^+$ ) 429.1678, found 429.1680

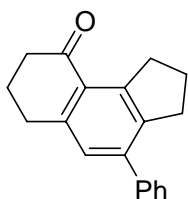

**Spectroscopic data of compound 5i:**  $^1\text{H}$  NMR (400 MHz,  $\text{CDCl}_3$ )  $\delta$  7.43 (m, 4H), 7.40-7.34 (m, 1H), 7.10 (s, 1H), 3.39 (t,  $J = 6.8$  Hz, 2H), 2.99 (t,  $J = 6$  Hz, 2H), 2.89 (t,  $J = 7.6$  Hz, 2H), 2.66 (t,  $J = 6.4$  Hz, 2H), 2.13 (q,  $J = 6.4$  Hz, 2H), 2.04 (q,  $J = 7.6$  Hz, 2H);  $^{13}\text{C}$  NMR (100 MHz,  $\text{CDCl}_3$ )  $\delta$  199.53, 147.64, 143.34, 142.51, 141.80, 140.51, 128.36, 128.29, 127.51, 127.32, 40.46, 34.70, 31.89, 30.22, 25.64, 23.36; FTIR (NaCl,  $\text{cm}^{-1}$ ) 1678, 1593; HRMS (ES) calcd for  $\text{C}_{19}\text{H}_{18}\text{ONa}^+$  ( $\text{M}+\text{Na}^+$ ) 285.1255, found 285.1260

### 3. $^1\text{H}$ and $^{13}\text{C}$ NMR Spectra of Compounds **2a-d**, **4a-f**, and **5h-i**

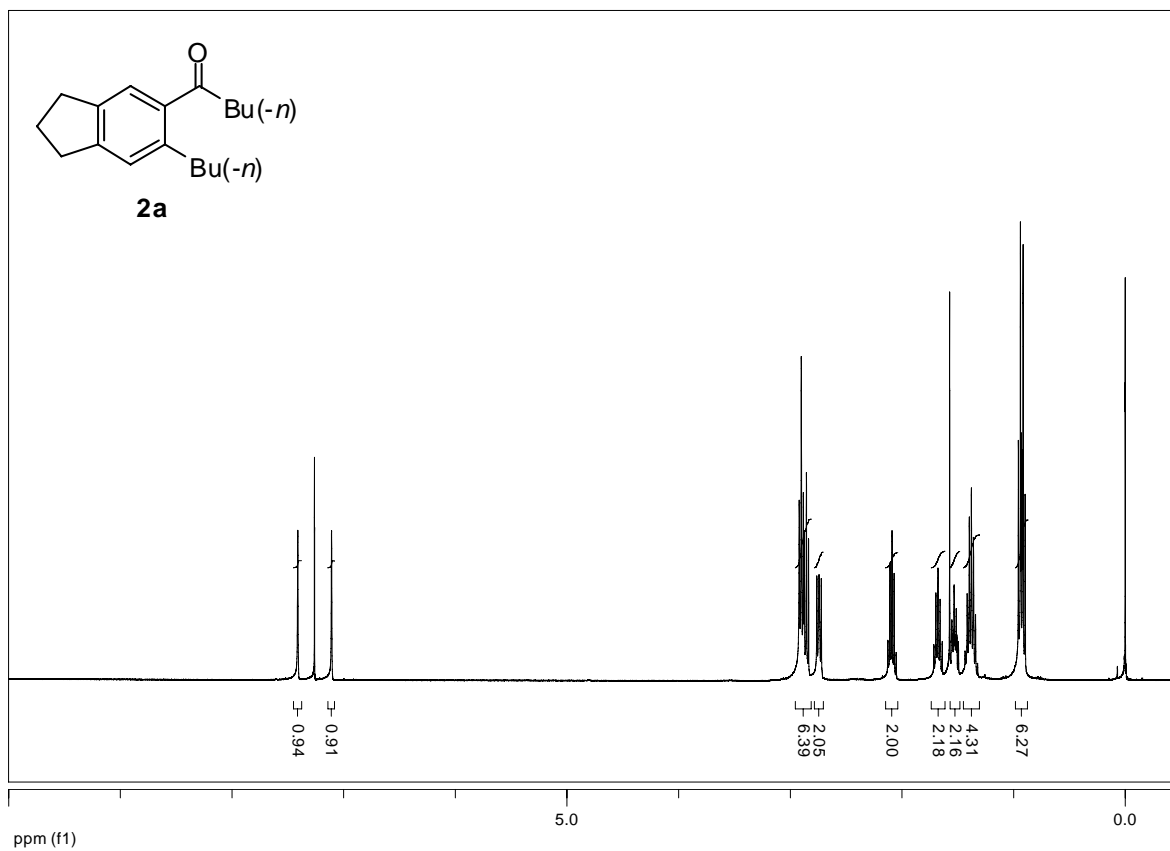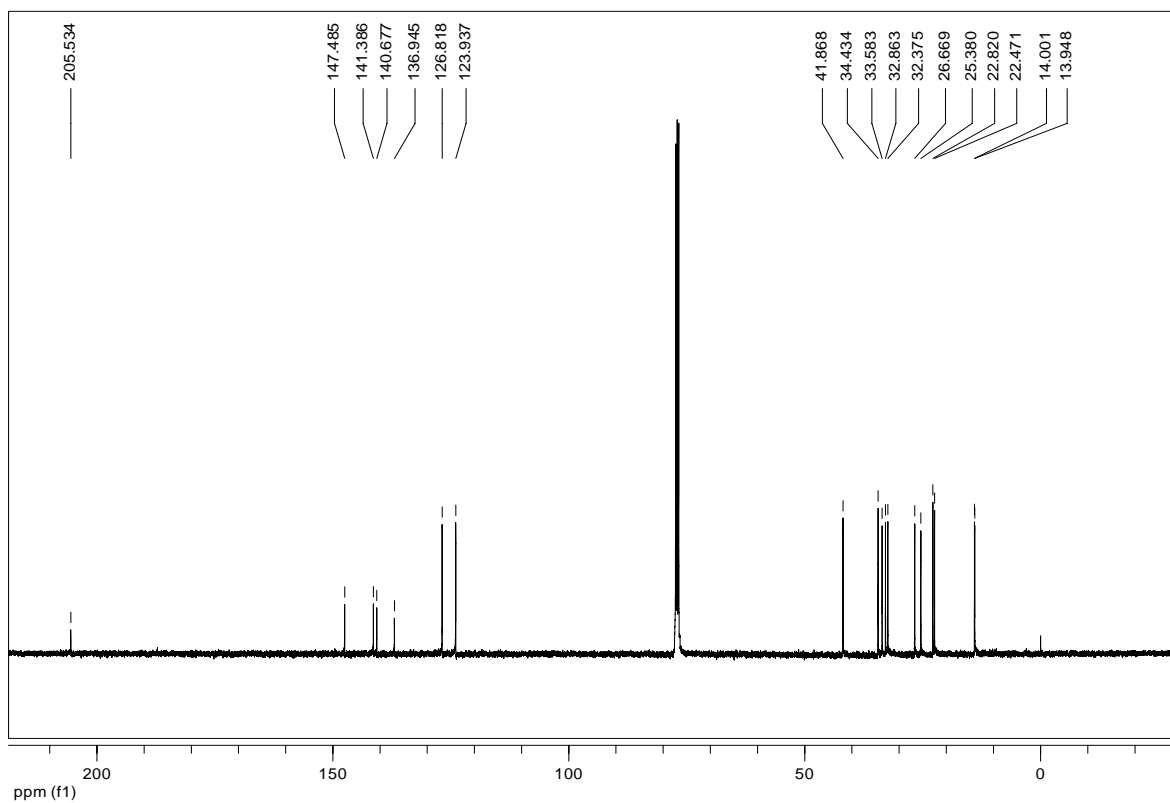

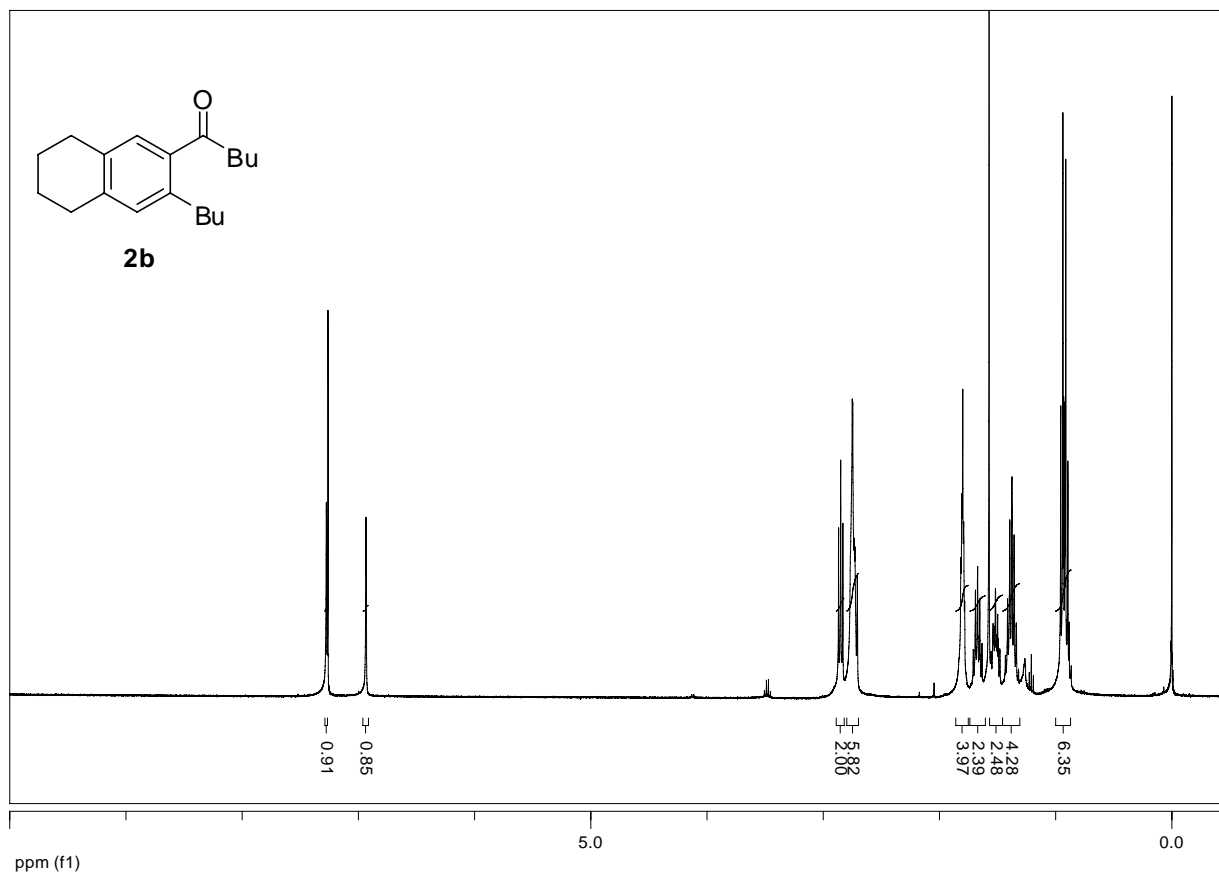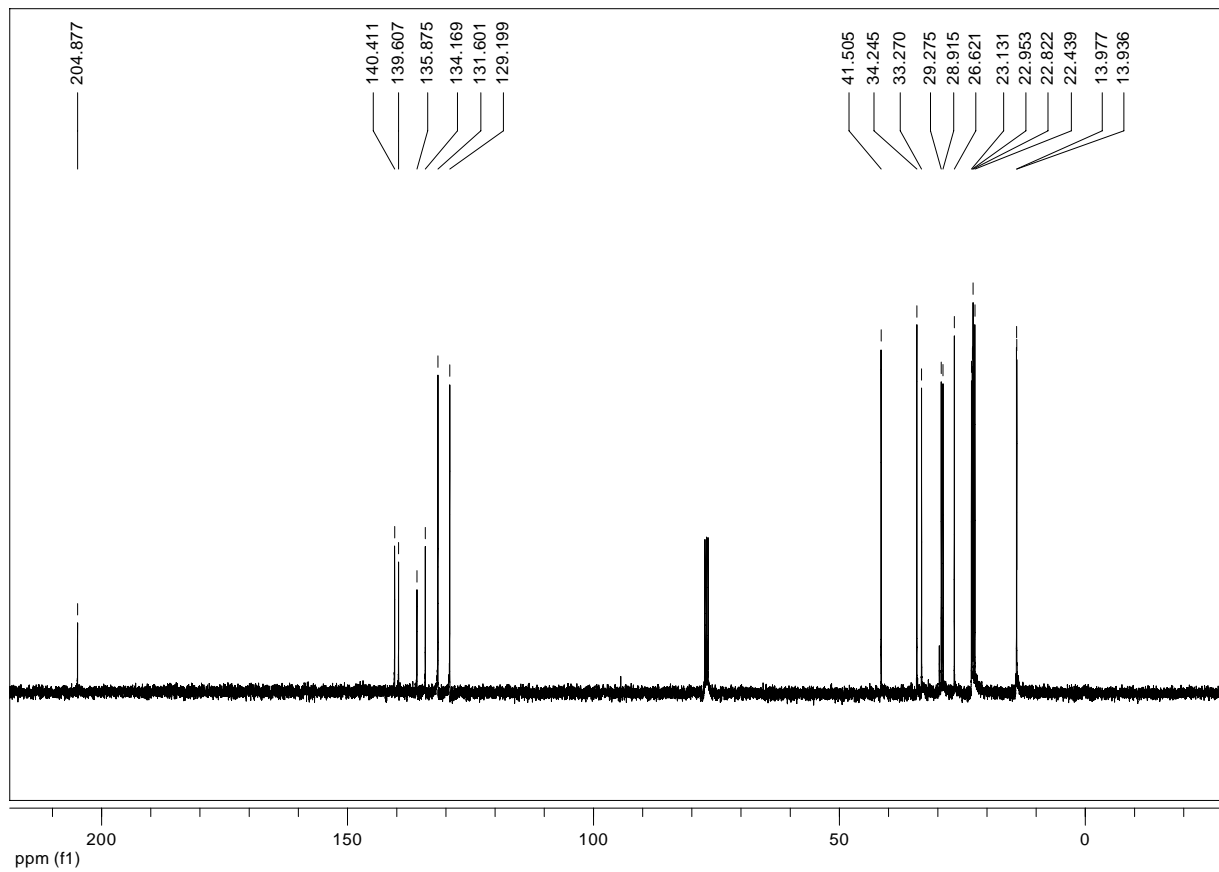

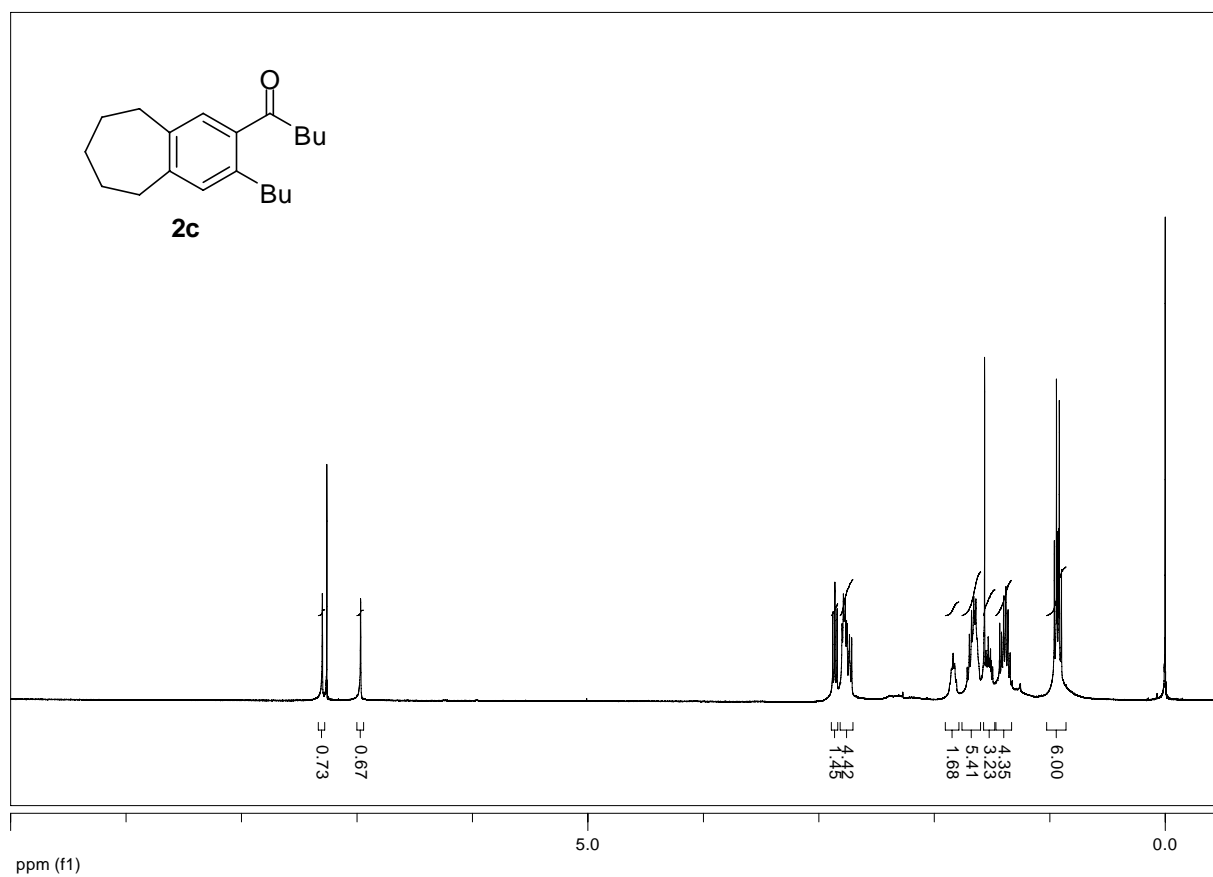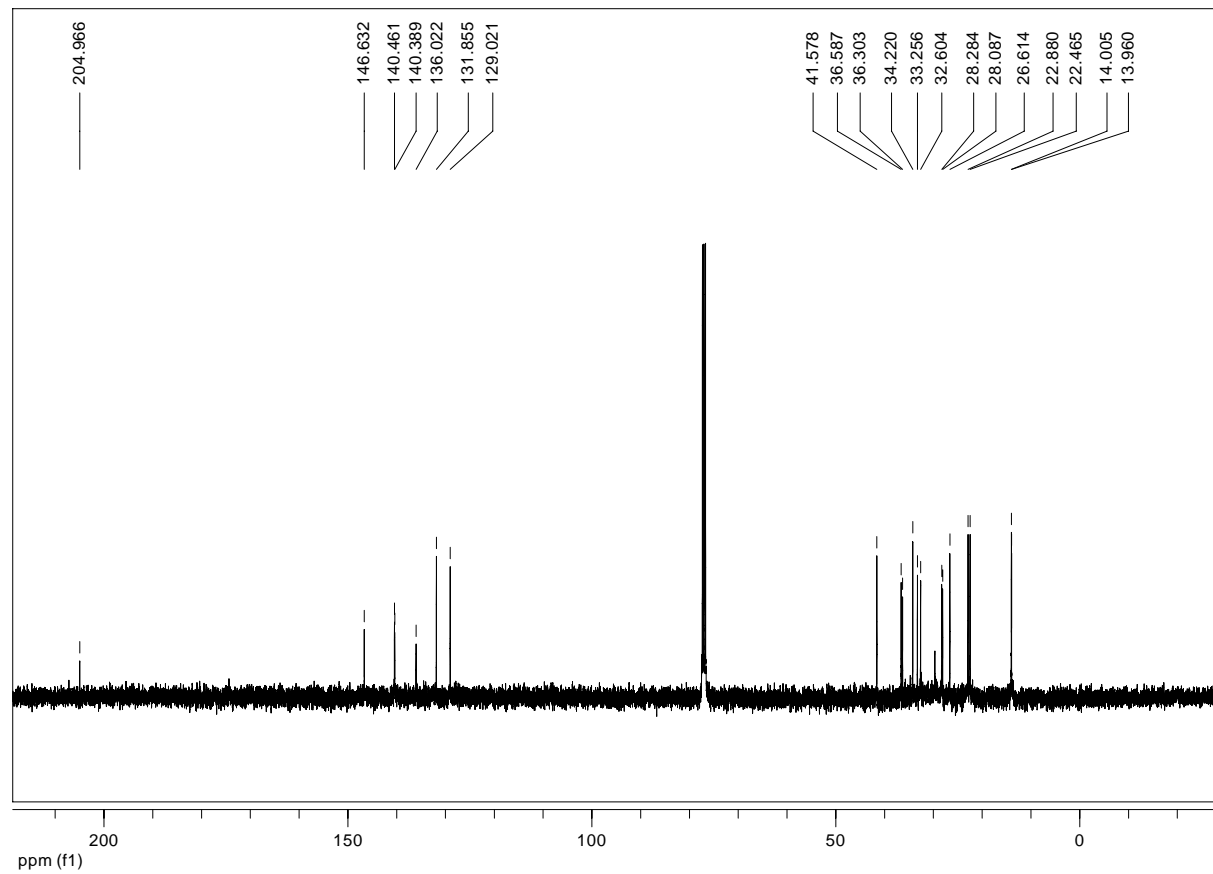

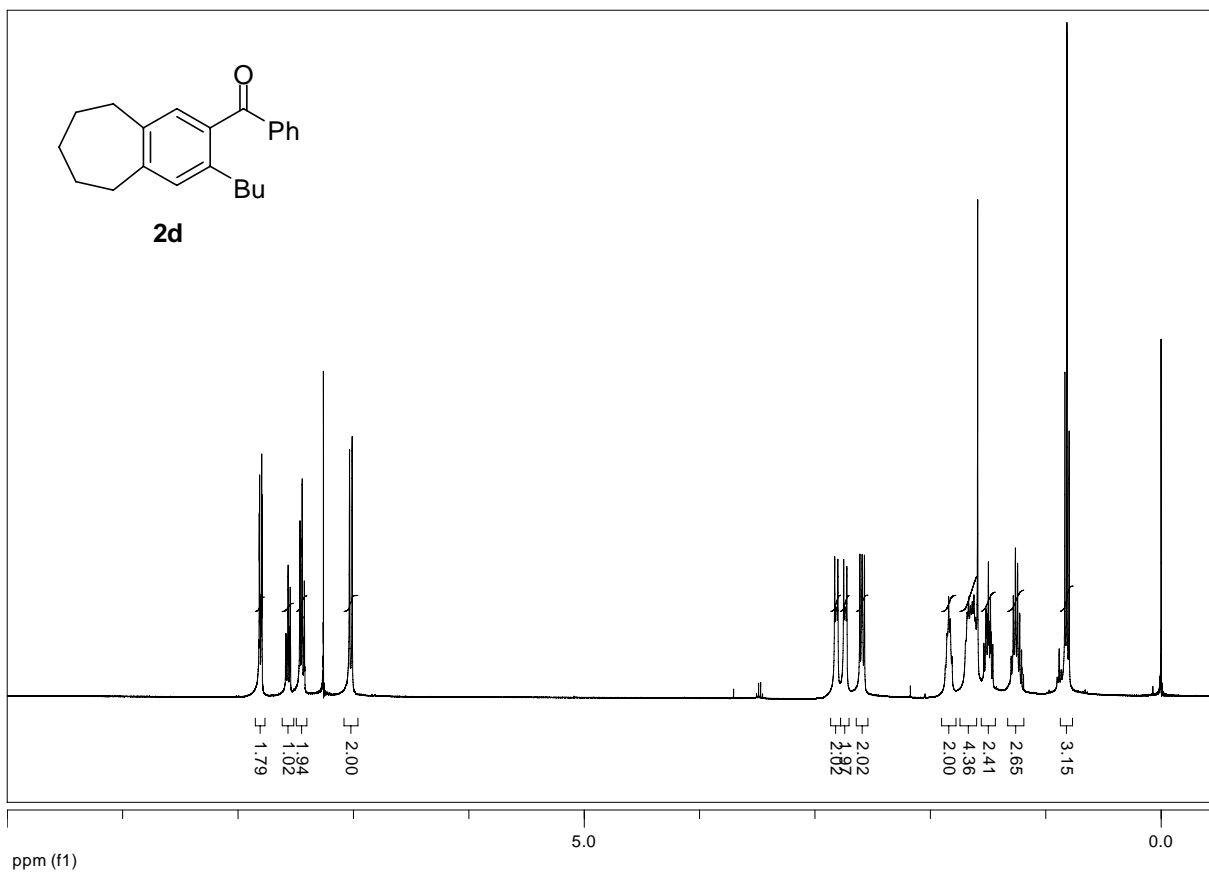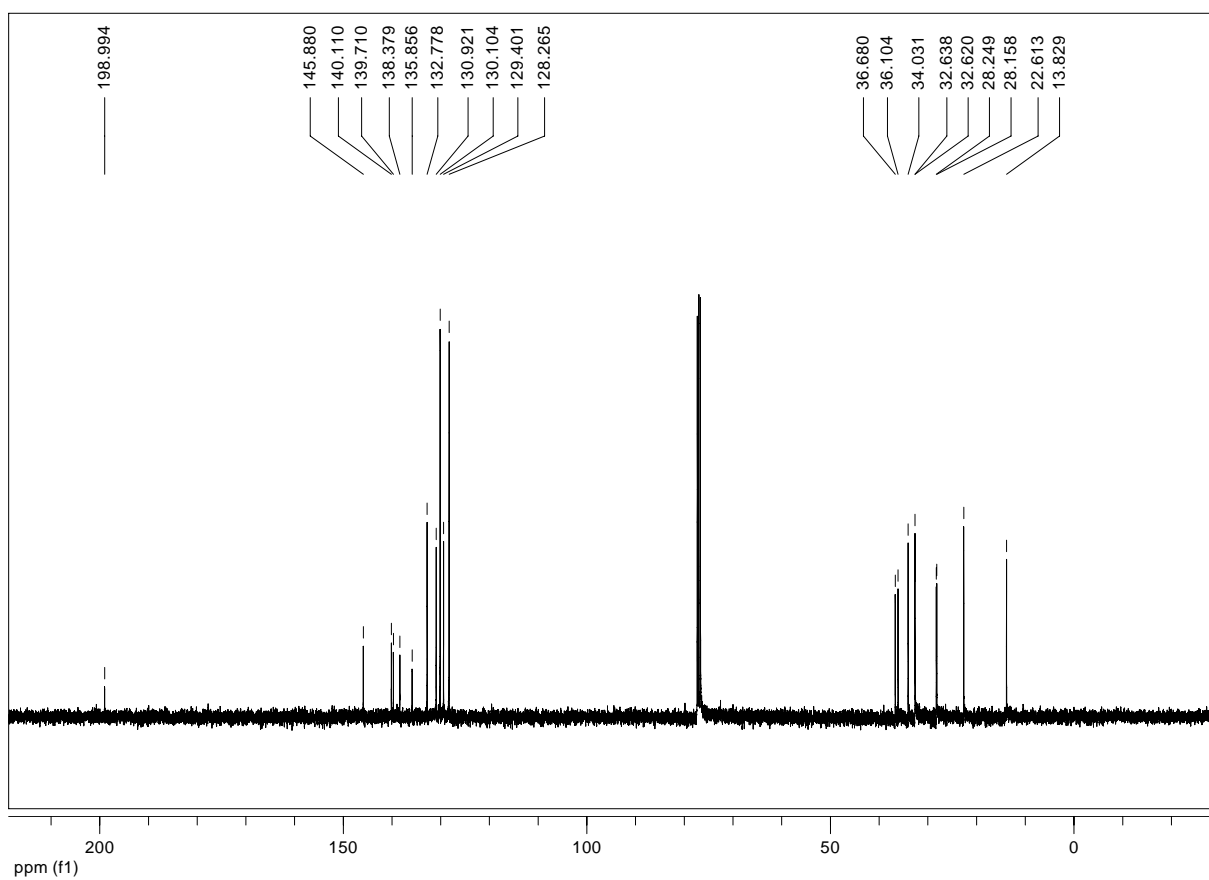



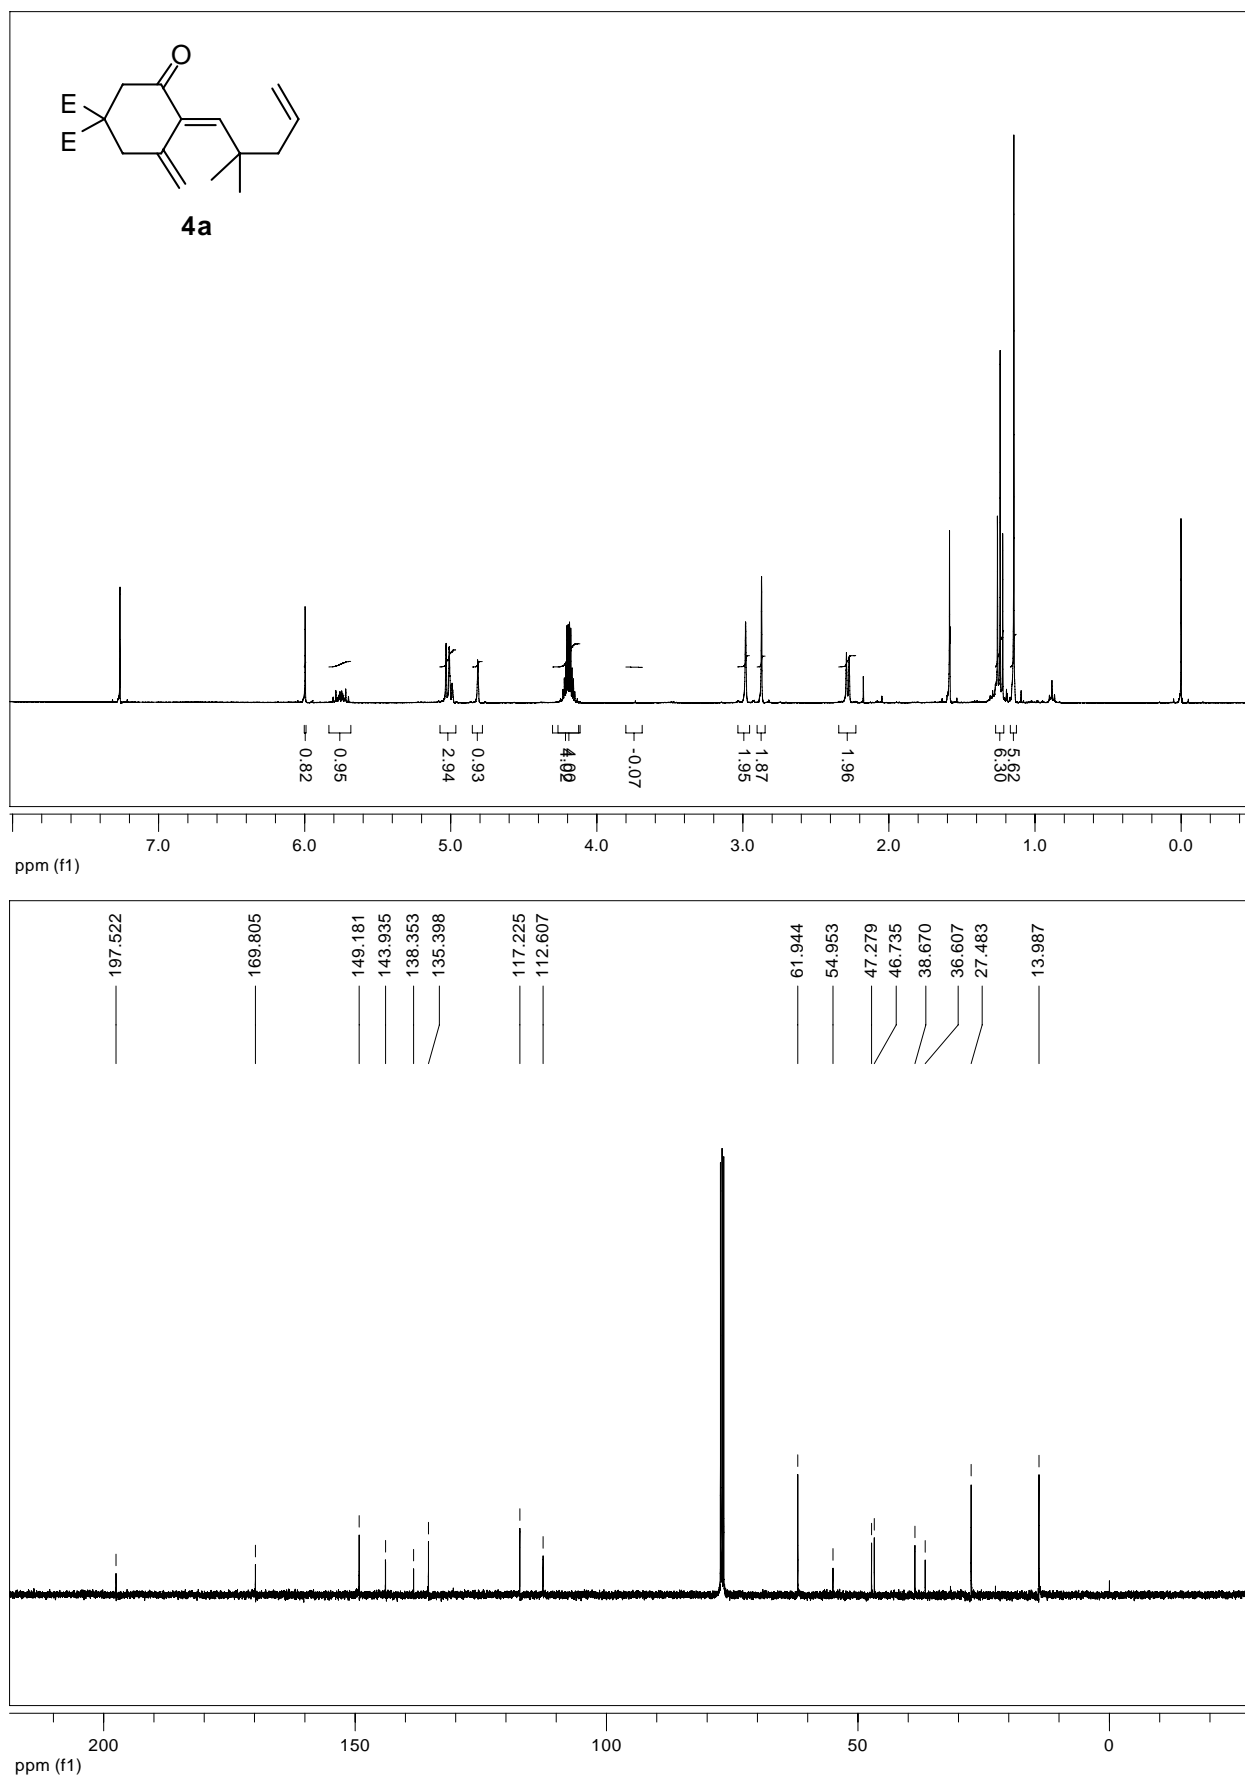

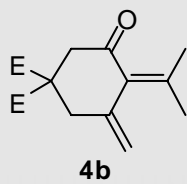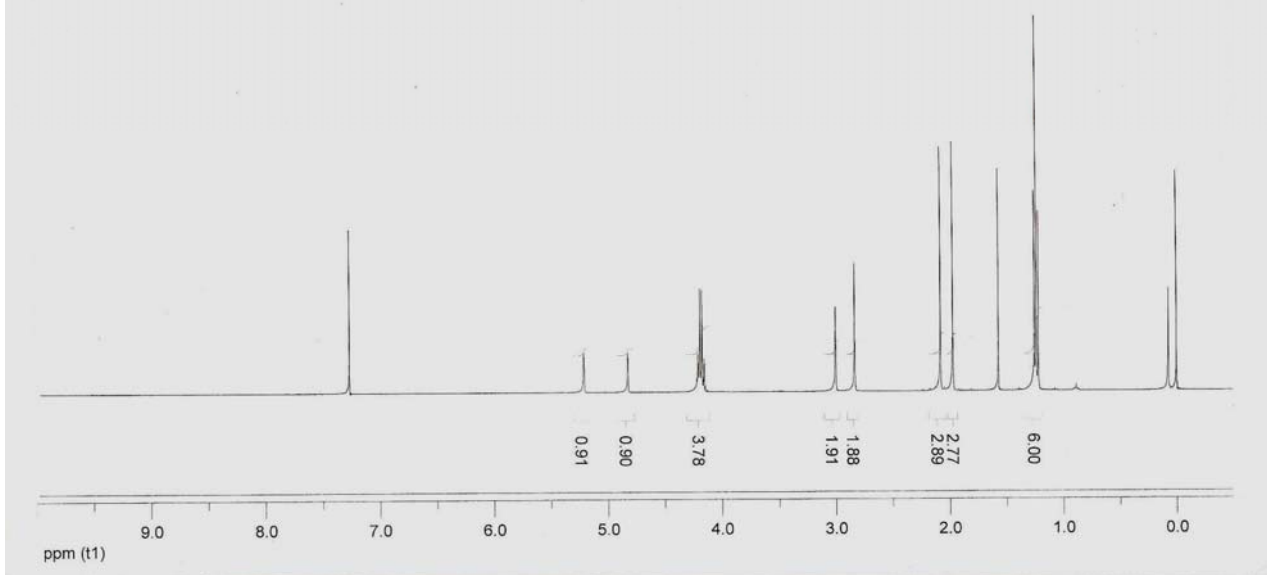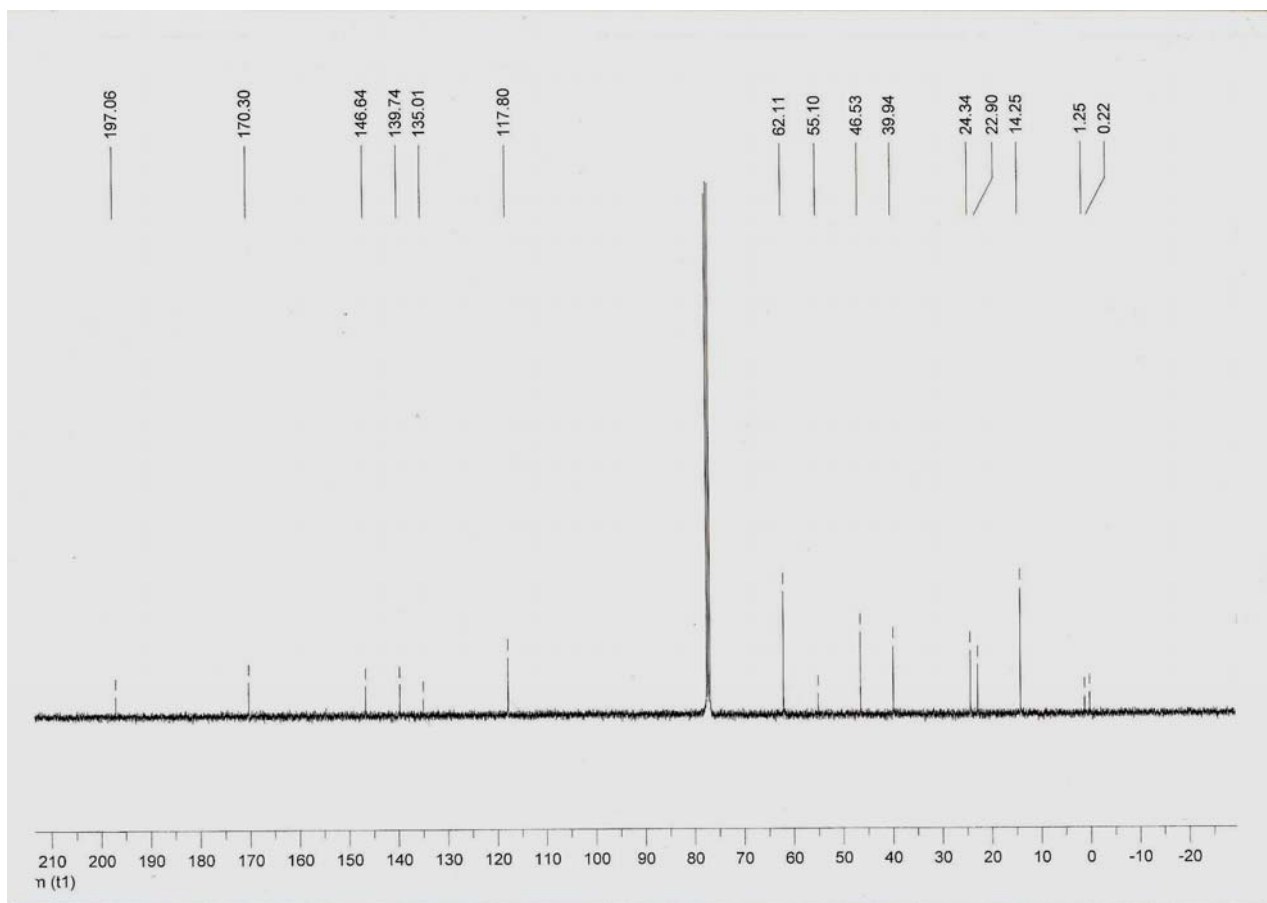

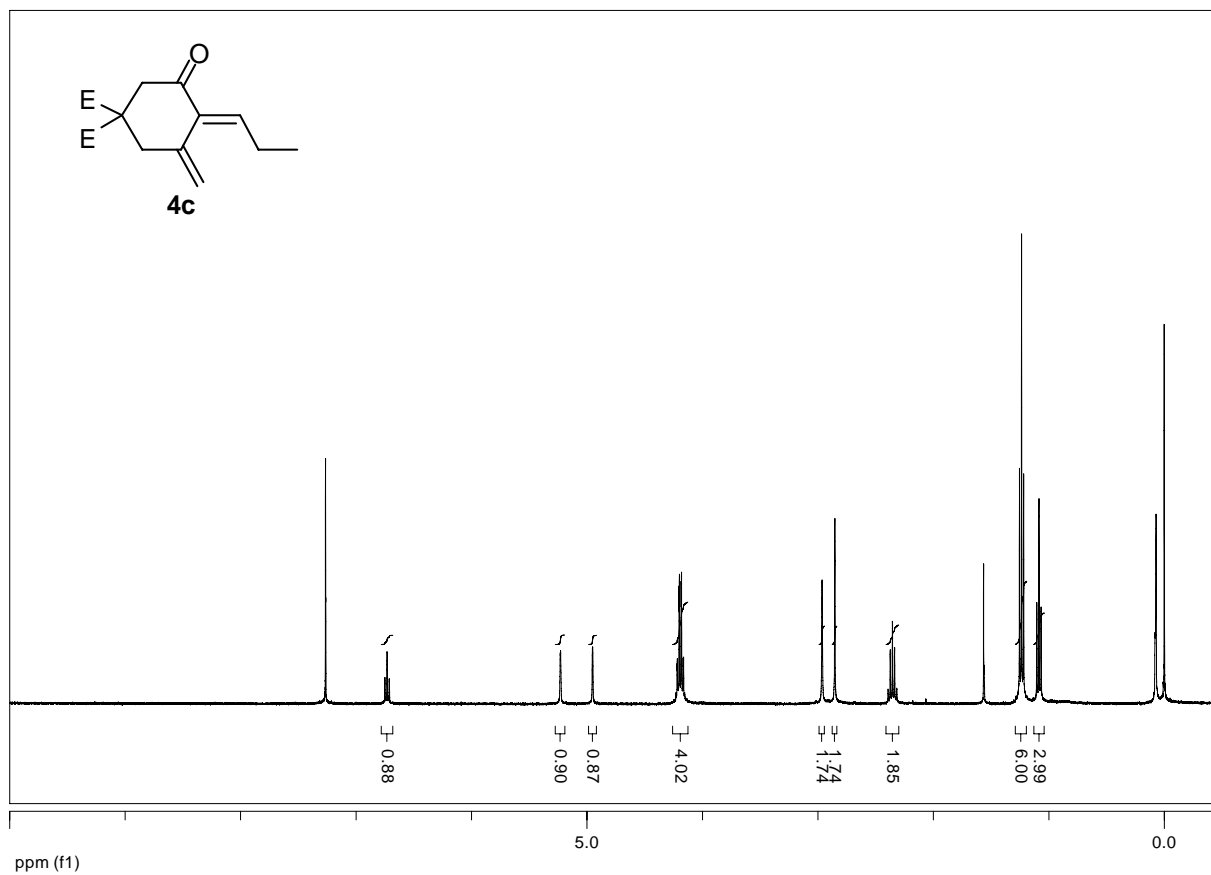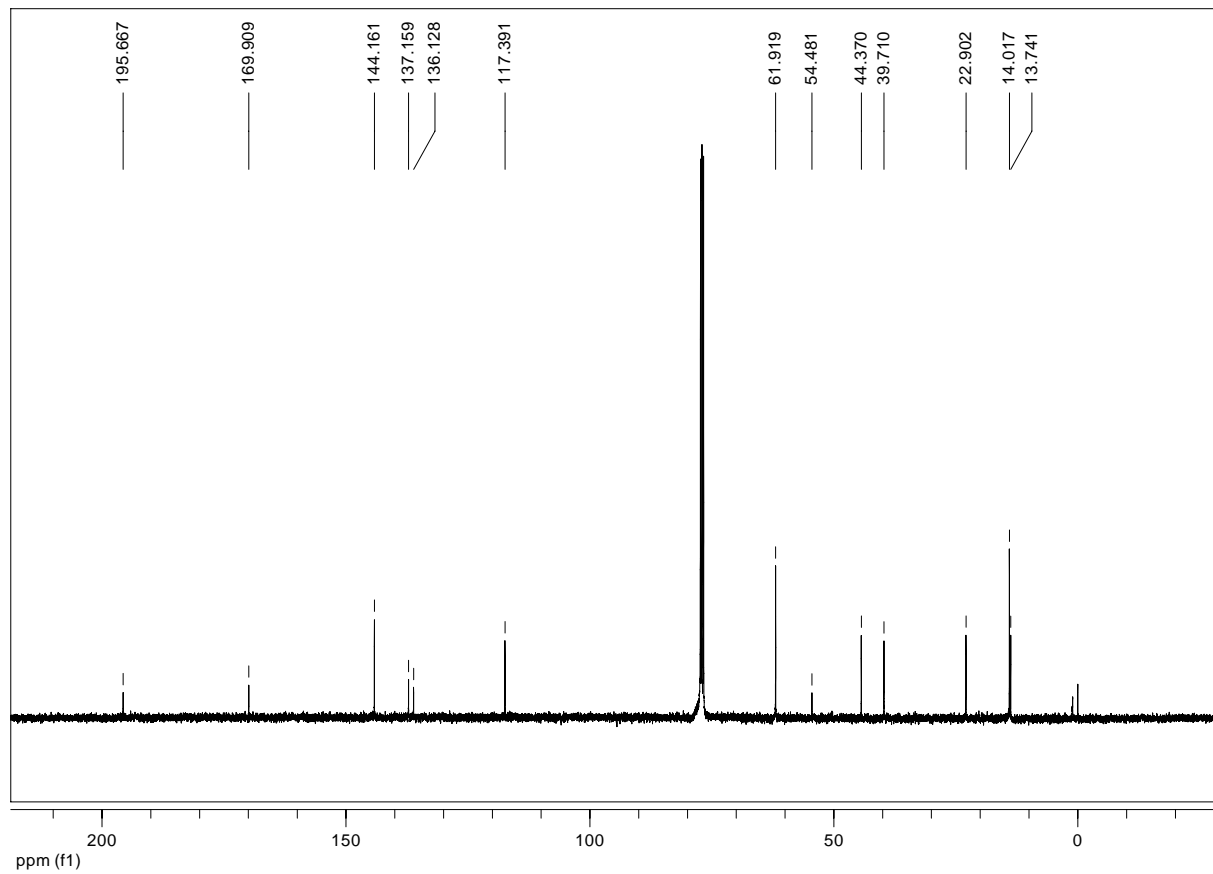

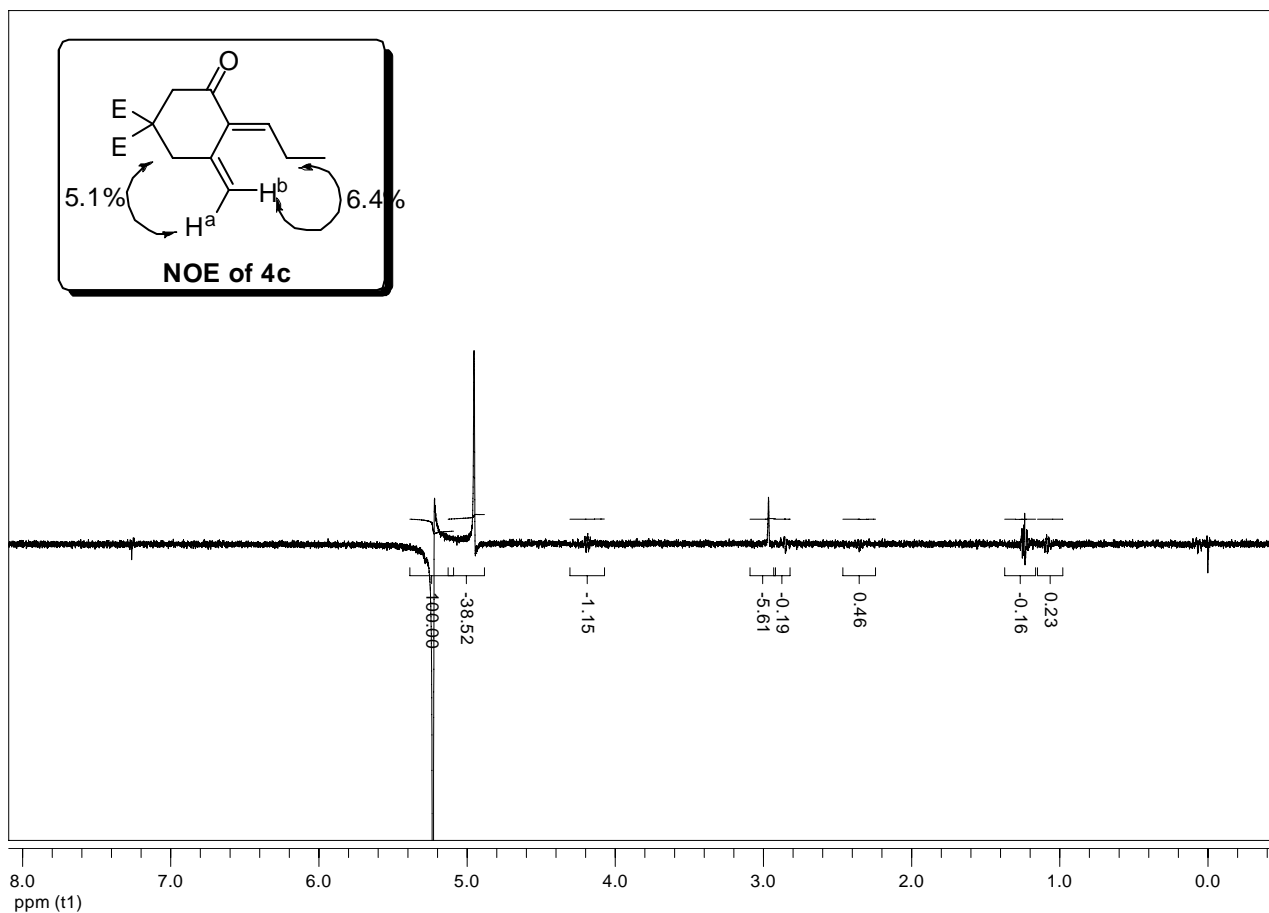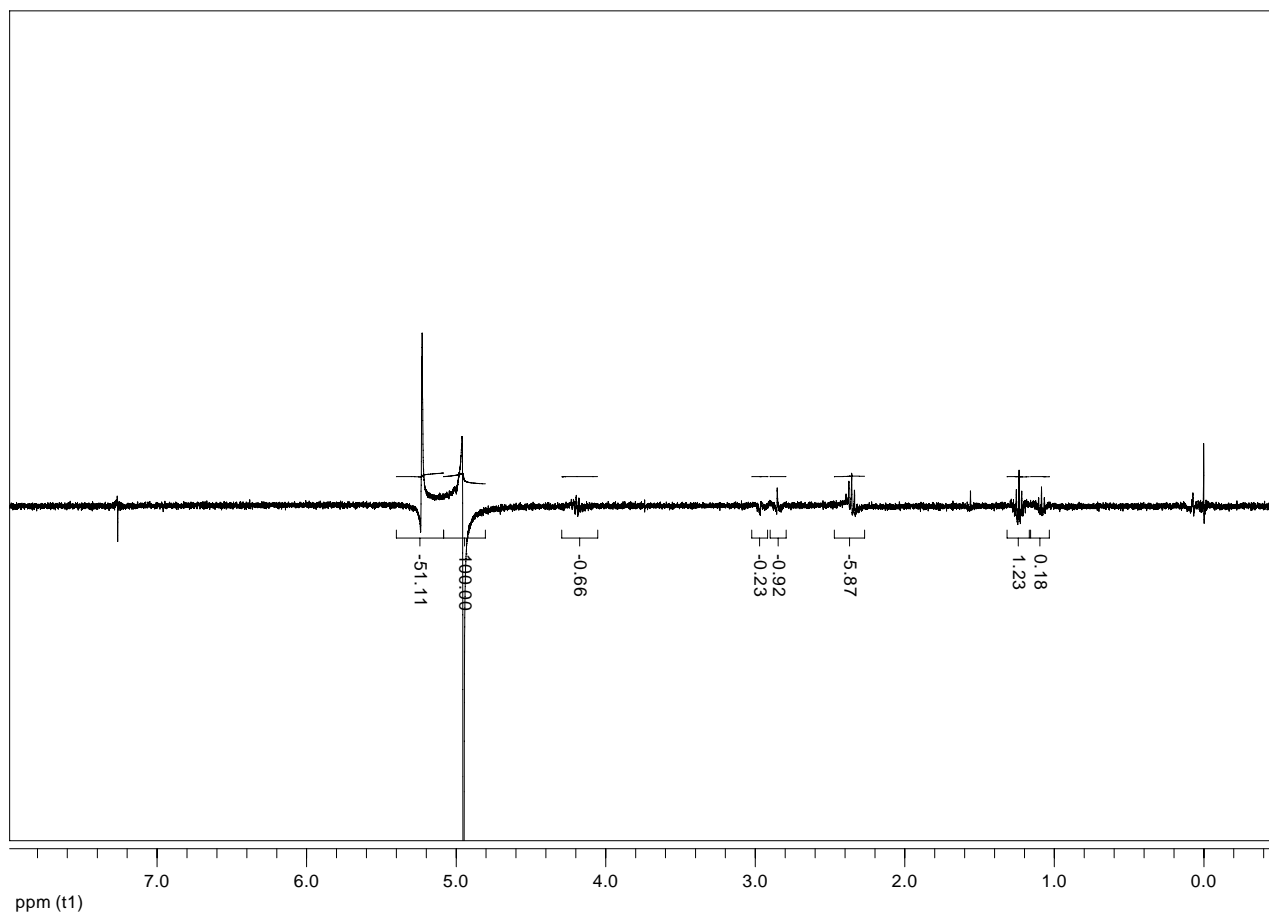

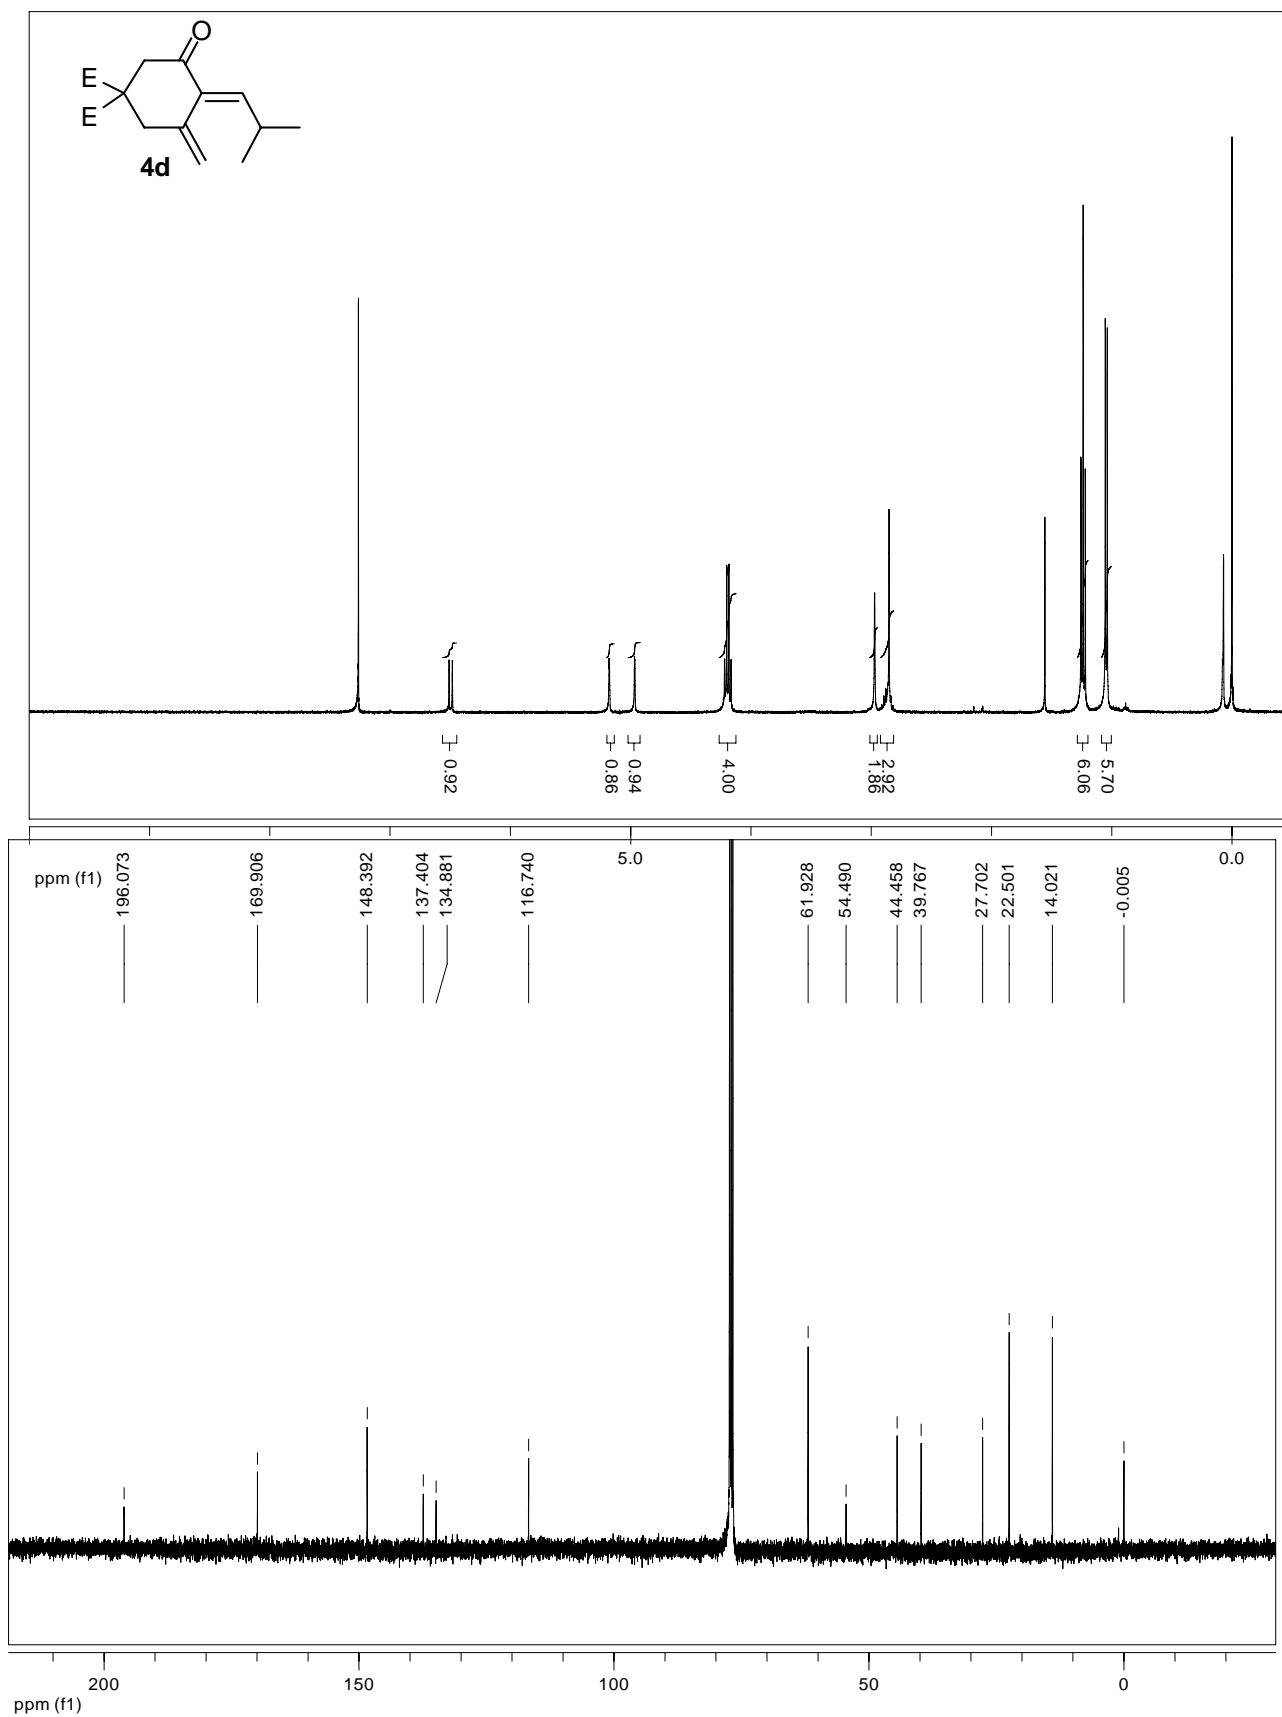

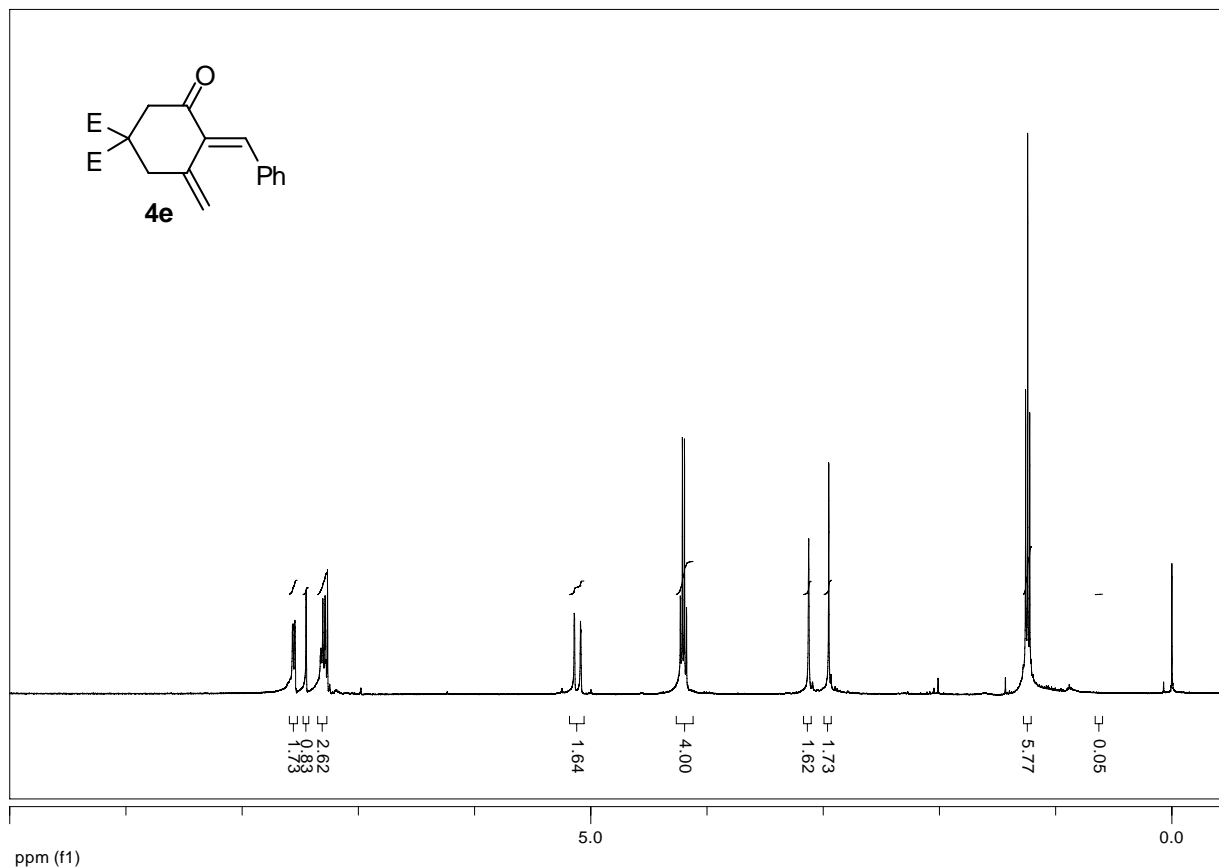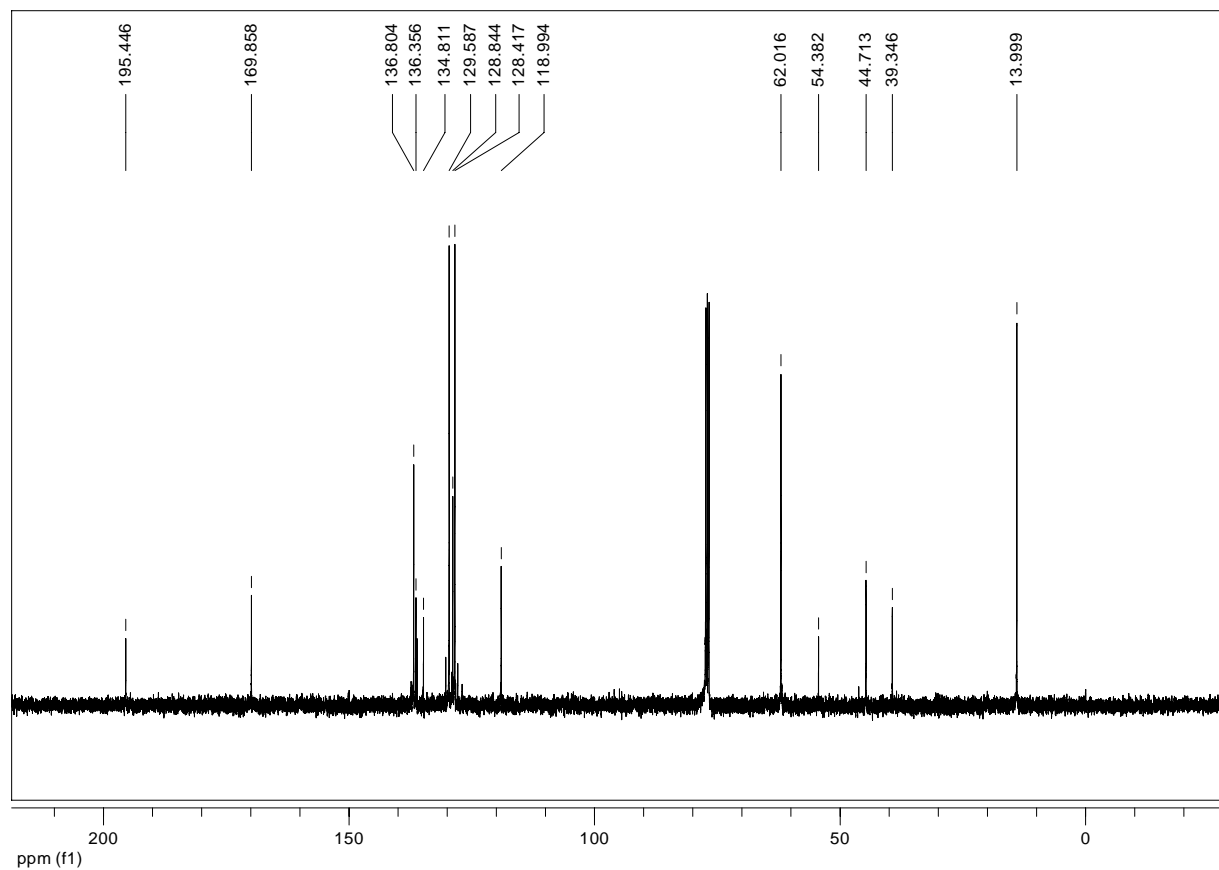

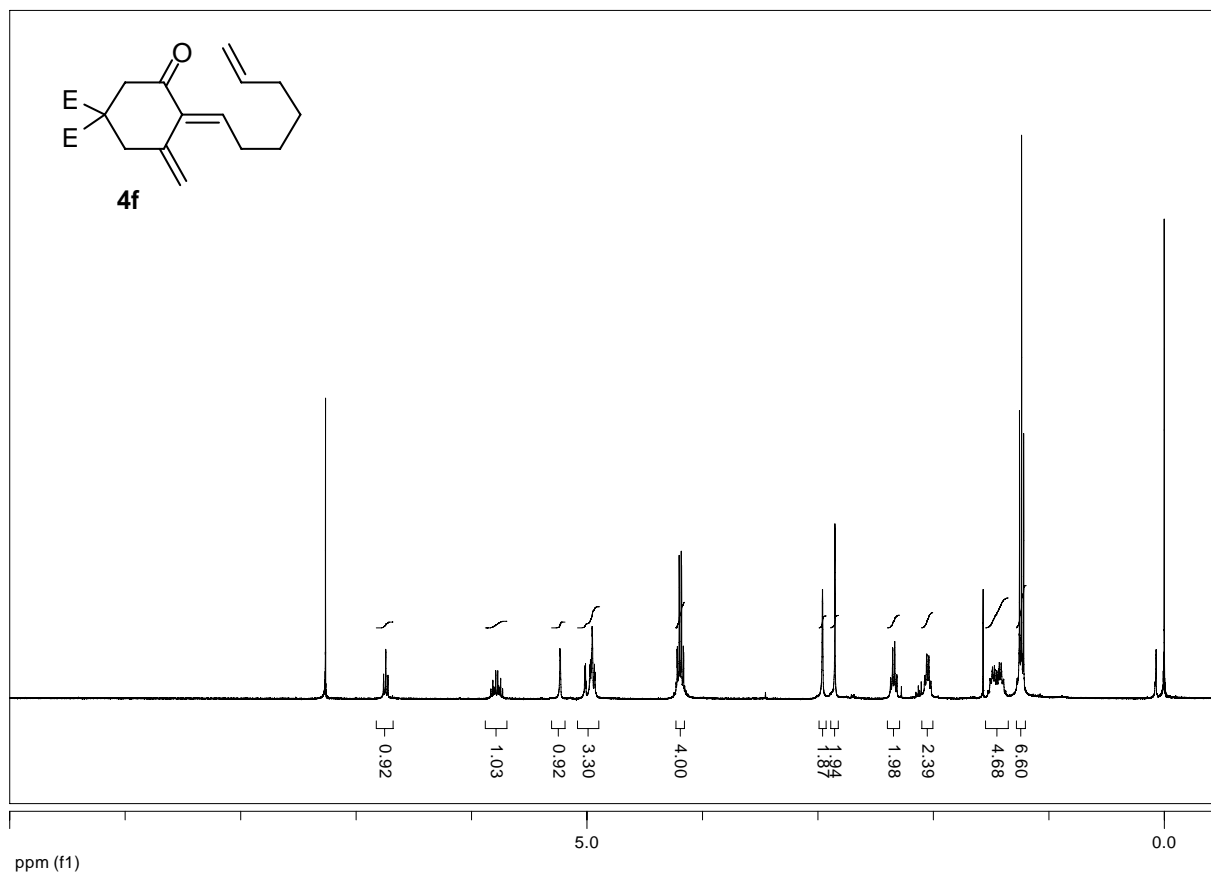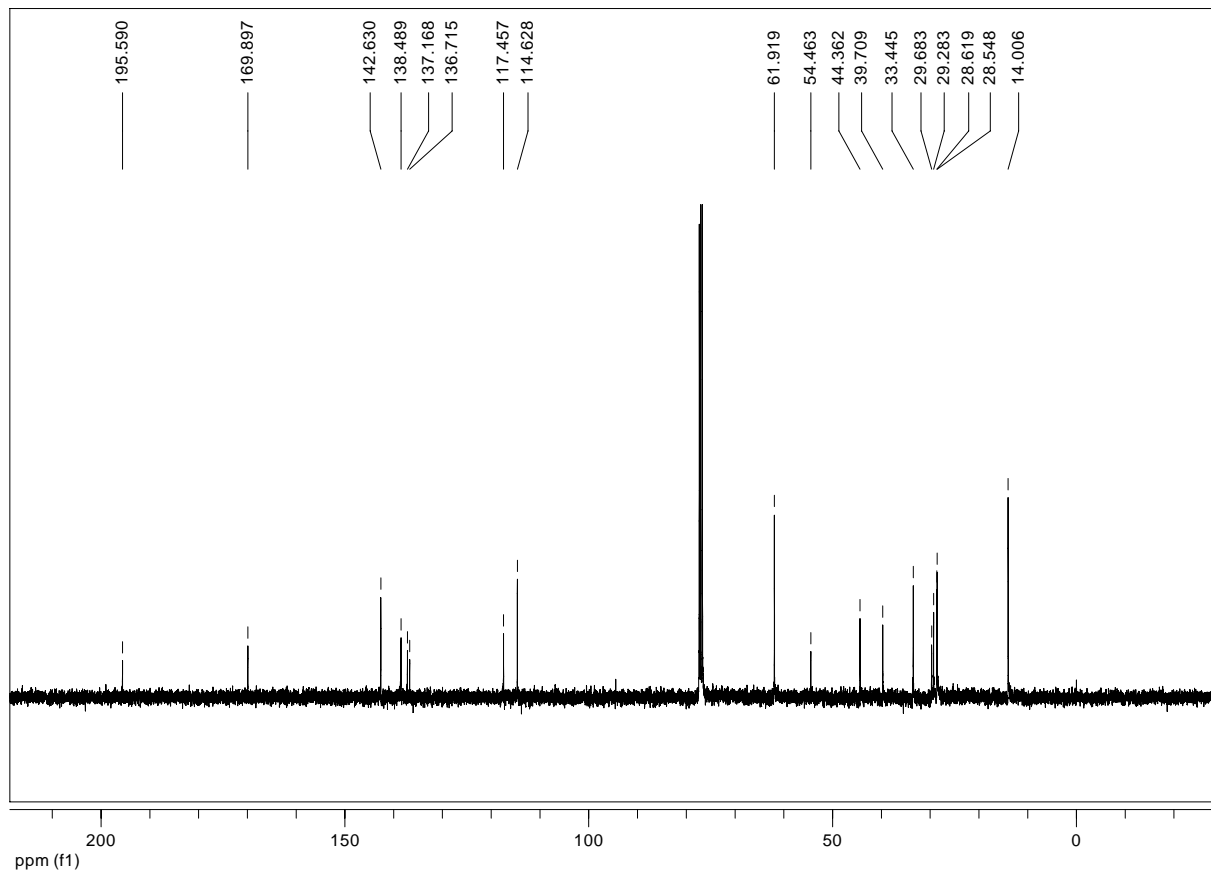

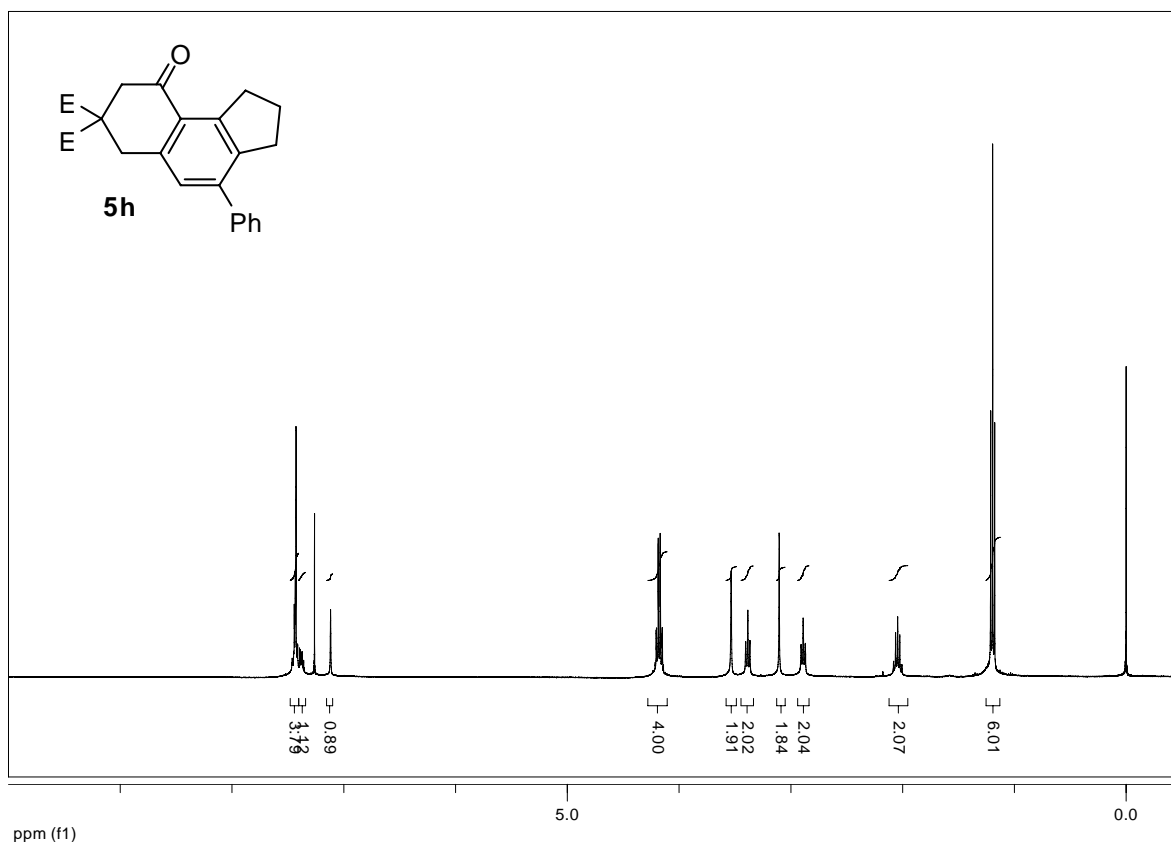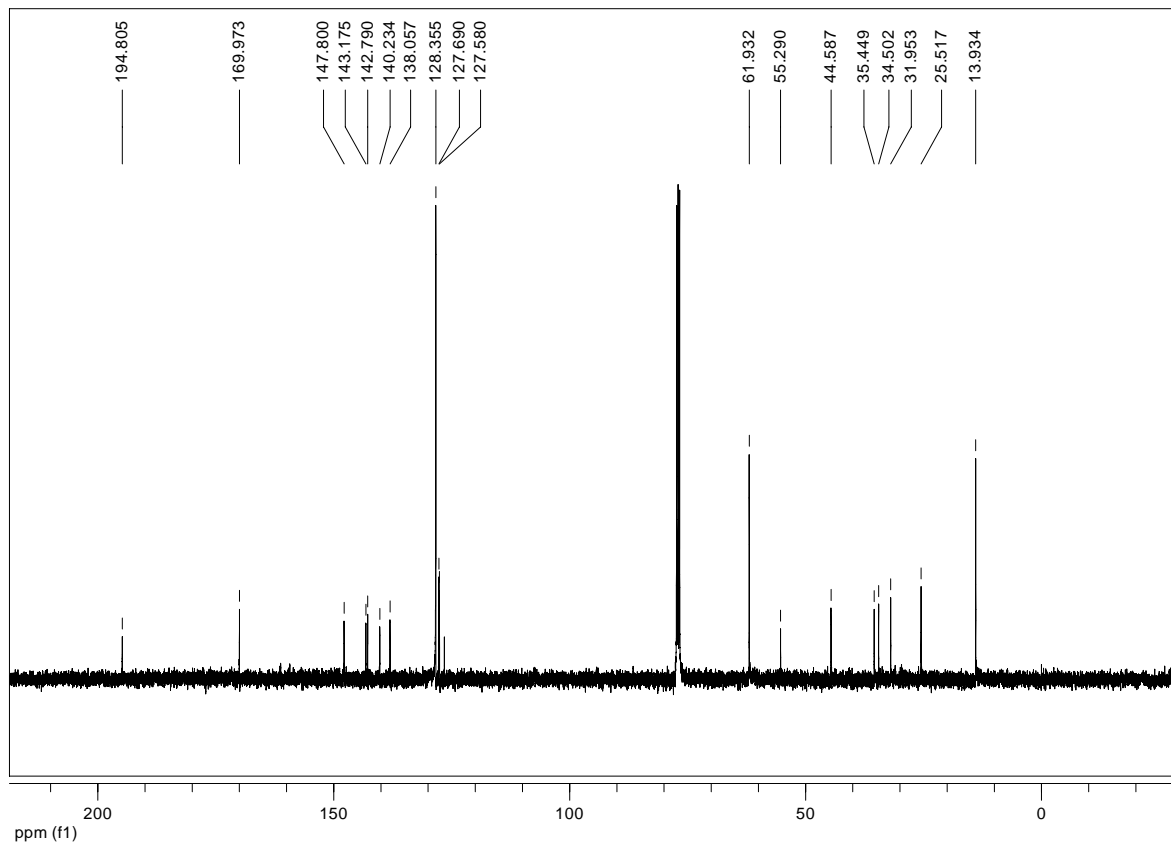



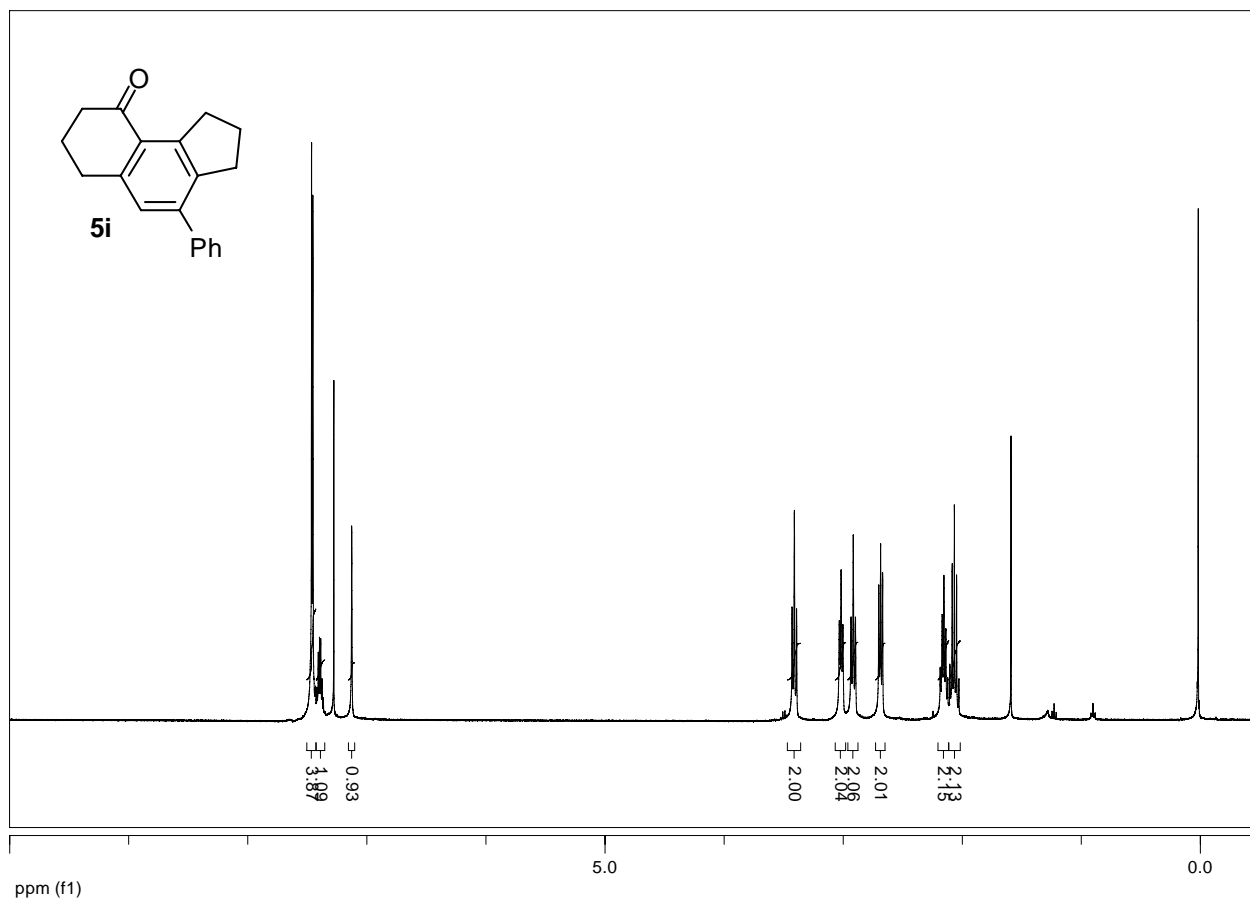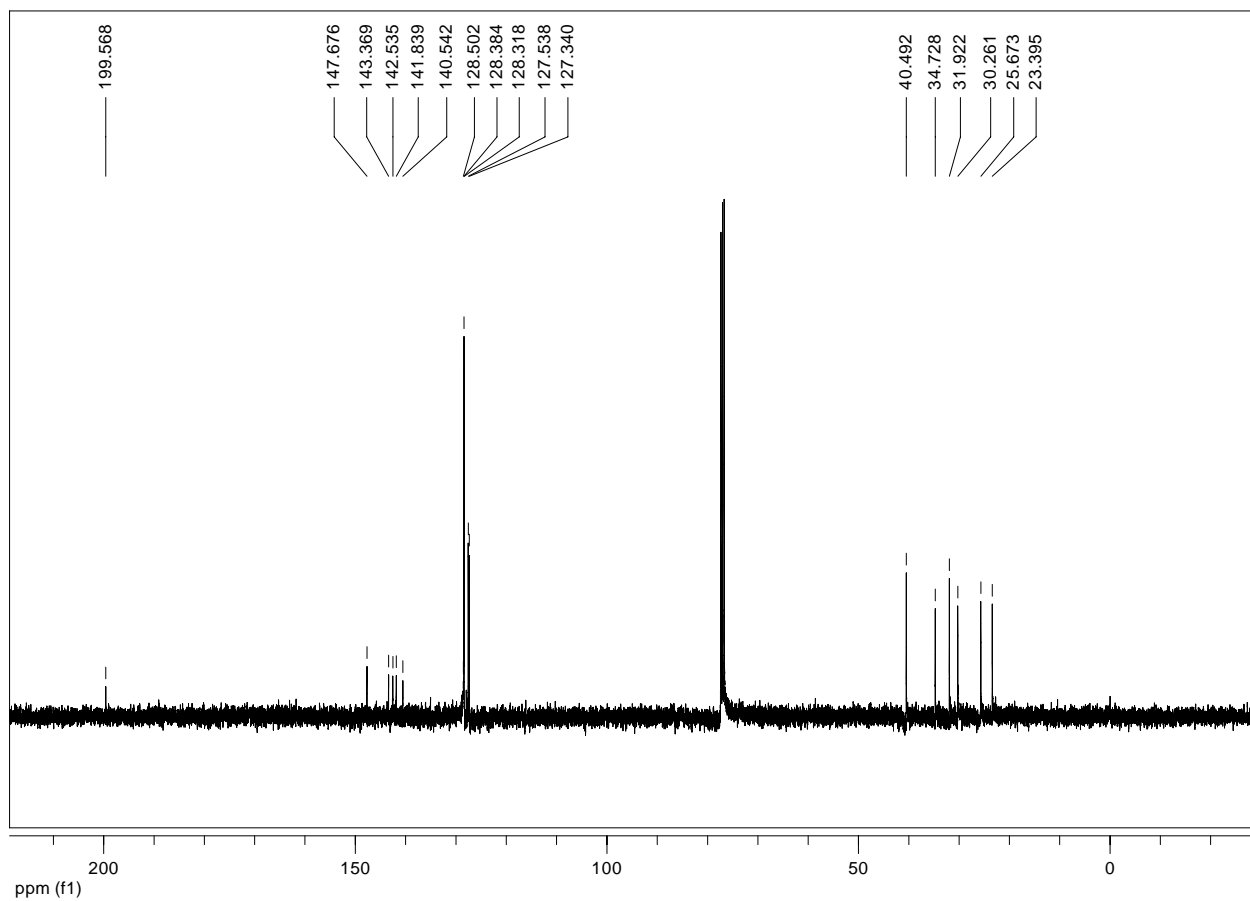

Supplement: b705320g.pdf [file b705320g.pdf]
